# Supplementary material for: Present and future ecological niche modeling of garter snake species from the Trans-Mexican Volcanic Belt
Source: PeerJ. 2018 Apr 11;6:e4618. doi: 10.7717/peerj.4618 (PMC5903425; doi:10.7717/peerj.4618)
Supplement: Data S1 [file peerj-06-4618-s001.xlsx]

## Sheet: T.cyrtopsis
Species	long	lat
Cyrtopsis	-97.333	18.219
Cyrtopsis	-100.326	19.459
Cyrtopsis	-103.898	29.0834
Cyrtopsis	-107.034	27.0979
Cyrtopsis	-102.058	26.9404
Cyrtopsis	-101.959	21.924
Cyrtopsis	-97.547	18.202
Cyrtopsis	-111.055	28.0164
Cyrtopsis	-110.406	31.3136
Cyrtopsis	-98.0145	18.5011
Cyrtopsis	-99.8901	23.8404
Cyrtopsis	-102.094	19.425
Cyrtopsis	-93.158	17.131
Cyrtopsis	-102.379	22.132
Cyrtopsis	-92.694	16.743
Cyrtopsis	-110.357	31.3221
Cyrtopsis	-98.602	20.109
Cyrtopsis	-99.221	23.048
Cyrtopsis	-97	17.584
Cyrtopsis	-98.0251	18.8383
Cyrtopsis	-108.935	31.1956
Cyrtopsis	-108.99	31.2839
Cyrtopsis	-100.286	20.9534
Cyrtopsis	-110.664	30.8598
Cyrtopsis	-110.389	31.3232
Cyrtopsis	-93.158	17.166
Cyrtopsis	-111.229	30.0447
Cyrtopsis	-102.517	22.2333
Cyrtopsis	-101.883	21.9833
Cyrtopsis	-93.9667	16.6667
Cyrtopsis	-92.3722	16.3639
Cyrtopsis	-92.9986	17.1944
Cyrtopsis	-93.7764	15.9694
Cyrtopsis	-92.6153	16.6889
Cyrtopsis	-105.1	29.1167
Cyrtopsis	-107.85	27.5167
Cyrtopsis	-106.8	29.5167
Cyrtopsis	-105.483	30.9333
Cyrtopsis	-107.217	27.1667
Cyrtopsis	-105.183	27.9167
Cyrtopsis	-107.497	27.5036
Cyrtopsis	-108.033	27.2833
Cyrtopsis	-107.45	27.5667
Cyrtopsis	-106.15	28.7333
Cyrtopsis	-106.2	28.4333
Cyrtopsis	-108.633	28.7167
Cyrtopsis	-107.95	28.7167
Cyrtopsis	-107.617	27.7333
Cyrtopsis	-107.683	27.5667
Cyrtopsis	-107.483	27.5167
Cyrtopsis	-105.263	29.9743
Cyrtopsis	-104.225	28.7934
Cyrtopsis	-108.609	31.2651
Cyrtopsis	-108.636	28.1694
Cyrtopsis	-107.927	27.8617
Cyrtopsis	-96.9667	19.3833
Cyrtopsis	-108.203	28.2067
Cyrtopsis	-108.217	28.1667
Cyrtopsis	-108.403	30.7472
Cyrtopsis	-108.283	30.5833
Cyrtopsis	-105.823	26.8097
Cyrtopsis	-107.6	28.6333
Cyrtopsis	-107.9	27.2167
Cyrtopsis	-107.852	29.055
Cyrtopsis	-102.55	29.0667
Cyrtopsis	-100.572	25.2425
Cyrtopsis	-102.633	29.0833
Cyrtopsis	-103.52	28.5667
Cyrtopsis	-103.941	19.4292
Cyrtopsis	-99.2167	19.2167
Cyrtopsis	-105.35	23.7833
Cyrtopsis	-105.133	23.8667
Cyrtopsis	-104.95	23.9333
Cyrtopsis	-105.433	23.6667
Cyrtopsis	-105.317	23.7833
Cyrtopsis	-105.3	23.7833
Cyrtopsis	-105	26.1167
Cyrtopsis	-104.275	23.2967
Cyrtopsis	-99.41	19.6283
Cyrtopsis	-99.7628	18.7389
Cyrtopsis	-100.427	18.8617
Cyrtopsis	-100.77	21.0333
Cyrtopsis	-100.938	20.8333
Cyrtopsis	-101.36	20.6833
Cyrtopsis	-99.5008	17.5569
Cyrtopsis	-98.65	20.5833
Cyrtopsis	-98.9167	20.2167
Cyrtopsis	-98.7667	20.8167
Cyrtopsis	-98.7333	20.3667
Cyrtopsis	-99.1667	21.0333
Cyrtopsis	-108.397	30.8817
Cyrtopsis	-98.65	20.6667
Cyrtopsis	-104.267	20.8833
Cyrtopsis	-104.8	20.4167
Cyrtopsis	-99.3133	19.0522
Cyrtopsis	-100.083	19.1833
Cyrtopsis	-101	19.7833
Cyrtopsis	-102.933	18.7667
Cyrtopsis	-101.367	19.6667
Cyrtopsis	-102.367	19.3333
Cyrtopsis	-100.256	19.5306
Cyrtopsis	-101.483	19.3333
Cyrtopsis	-99.2	19.0333
Cyrtopsis	-104.65	22.2167
Cyrtopsis	-94.1888	16.5769
Cyrtopsis	-105.317	23.8833
Cyrtopsis	-96.0471	17.2653
Cyrtopsis	-99.7261	23.9908
Cyrtopsis	-100.182	25.3422
Cyrtopsis	-100.473	26.5519
Cyrtopsis	-100.161	25.2503
Cyrtopsis	-100.309	25.5667
Cyrtopsis	-100.207	24.7833
Cyrtopsis	-100.213	23.4494
Cyrtopsis	-94.2	16.6667
Cyrtopsis	-96.6667	17.1667
Cyrtopsis	-94.9472	16.5669
Cyrtopsis	-96.695	17.1267
Cyrtopsis	-96.2244	18.0064
Cyrtopsis	-96.5667	17.2333
Cyrtopsis	-96.4667	16.0667
Cyrtopsis	-96.9833	16.4333
Cyrtopsis	-97	17.2333
Cyrtopsis	-97.8833	17.3167
Cyrtopsis	-97.4369	18.3189
Cyrtopsis	-97.4683	18.1675
Cyrtopsis	-98.1	19.6667
Cyrtopsis	-97.4356	18.3864
Cyrtopsis	-97.4333	18.4167
Cyrtopsis	-97.4681	18.2175
Cyrtopsis	-97.4864	18.2847
Cyrtopsis	-99.6094	21.1328
Cyrtopsis	-100.147	20.3333
Cyrtopsis	-99.4444	21.2858
Cyrtopsis	-100.13	20.1417
Cyrtopsis	-100.109	20.6181
Cyrtopsis	-99.1278	21.2917
Cyrtopsis	-99.6278	21.2042
Cyrtopsis	-99.1167	21.2833
Cyrtopsis	-99.6247	21.1356
Cyrtopsis	-100.1	20.3667
Cyrtopsis	-100.154	20.2408
Cyrtopsis	-100.167	20.8108
Cyrtopsis	-99.2	22.8667
Cyrtopsis	-100.615	22.0319
Cyrtopsis	-100.331	22.6471
Cyrtopsis	-100.608	22.6563
Cyrtopsis	-100.384	22.6325
Cyrtopsis	-105.833	23.4333
Cyrtopsis	-108.979	27.0486
Cyrtopsis	-109.56	27.1978
Cyrtopsis	-109.41	28.0667
Cyrtopsis	-109.933	29.6333
Cyrtopsis	-109.537	27.1783
Cyrtopsis	-112.85	31.4167
Cyrtopsis	-109.656	28.4836
Cyrtopsis	-110.86	30.7783
Cyrtopsis	-110.41	27.7578
Cyrtopsis	-110.859	30.7511
Cyrtopsis	-109.343	27.0733
Cyrtopsis	-111.121	30.6327
Cyrtopsis	-111.029	28.5773
Cyrtopsis	-110.214	29.4764
Cyrtopsis	-110.44	28.7489
Cyrtopsis	-108.933	27.0167
Cyrtopsis	-109.149	27.0983
Cyrtopsis	-108.785	27.0376
Cyrtopsis	-109.353	27.075
Cyrtopsis	-108.067	27.0167
Cyrtopsis	-109.122	27.0972
Cyrtopsis	-110.166	30.3347
Cyrtopsis	-109.013	30.6453
Cyrtopsis	-109.367	27.1667
Cyrtopsis	-108.792	28.3118
Cyrtopsis	-108.804	31.3189
Cyrtopsis	-108.677	26.9819
Cyrtopsis	-108.791	28.3011
Cyrtopsis	-109.933	27.4833
Cyrtopsis	-109.883	29.1667
Cyrtopsis	-109.68	29.8028
Cyrtopsis	-109.445	27.0817
Cyrtopsis	-110.783	31.2667
Cyrtopsis	-109.533	28.4667
Cyrtopsis	-109.059	30.6464
Cyrtopsis	-113.296	31.9967
Cyrtopsis	-109.368	28.4879
Cyrtopsis	-111.65	29.4688
Cyrtopsis	-99.7058	23.6011
Cyrtopsis	-98.195	19.3333
Cyrtopsis	-97.0617	19.6183
Cyrtopsis	-97.1106	18.8519
Cyrtopsis	-101.299	21.0016
Cyrtopsis	-102.063	26.9249
Cyrtopsis	-101.969	21.9982
Cyrtopsis	-101.961	21.8225
Cyrtopsis	-101.29	20.8766
Cyrtopsis	-100.362	21.8758
Cyrtopsis	-108.162	29.6541
Cyrtopsis	-101.06	25.1219
Cyrtopsis	-104.05	20.7257
Cyrtopsis	-100.451	21.5027
Cyrtopsis	-102.404	22.1087
Cyrtopsis	-99.0565	20.6827
Cyrtopsis	-103.835	29.1389
Cyrtopsis	-103.936	22.7132
Cyrtopsis	-99.7065	23.5654
Cyrtopsis	-101.37	24.0768
Cyrtopsis	-100.531	25.5361
Cyrtopsis	-107.442	27.6778
Cyrtopsis	-100.81	25.2482
Cyrtopsis	-100.93	25.3451
Cyrtopsis	-99.8134	19.3649
Cyrtopsis	-108.125	29.2461
Cyrtopsis	-100.253	19.4281
Cyrtopsis	-110.59	28.3443
Cyrtopsis	-110.212	31.2926
Cyrtopsis	-101.002	25.2616
Cyrtopsis	-99.8729	20.7805
Cyrtopsis	-108.19	29.6319
Cyrtopsis	-108.072	29.6744
Cyrtopsis	-108.212	29.6624
Cyrtopsis	-106.563	28.8086
Cyrtopsis	-100.953	25.2896
Cyrtopsis	-101.403	26.5361
Cyrtopsis	-98.8153	19.4956
Cyrtopsis	-99.153	19.397
Cyrtopsis	-101.602	27.1547
Cyrtopsis	-111.07	28.0351
Cyrtopsis	-111.015	28.1539
Cyrtopsis	-108.382	28.296
Cyrtopsis	-99.7214	23.5551
Cyrtopsis	-107.626	28.8307
Cyrtopsis	-108.16	27.3271
Cyrtopsis	-97.6515	19.2515
Cyrtopsis	-98.2426	17.2246
Cyrtopsis	-100.806	19.981
Cyrtopsis	-102.446	22.0809
Cyrtopsis	-101.151	22.0858
Cyrtopsis	-99.0085	21.5373
Cyrtopsis	-106.246	28.9092
Cyrtopsis	-100.113	23.8247
Cyrtopsis	-99.8933	24.5819
Cyrtopsis	-110.933	29.3238
Cyrtopsis	-110.896	29.2585
Cyrtopsis	-100.924	23.7158
Cyrtopsis	-103.895	22.1962
Cyrtopsis	-98.566	20.0599
Cyrtopsis	-101.33	21.0375
Cyrtopsis	-104.163	19.5402
Cyrtopsis	-106.876	28.2852
Cyrtopsis	-107.325	26.2215
Cyrtopsis	-99.6835	19.266
Cyrtopsis	-99.6382	19.335
Cyrtopsis	-98.1406	19.9805
Cyrtopsis	-100.199	19.0514
Cyrtopsis	-108.389	28.1956
Cyrtopsis	-99.8576	24.3149
Cyrtopsis	-100.575	25.2878
Cyrtopsis	-100.504	25.2532
Cyrtopsis	-103.51	21.403
Cyrtopsis	-101.739	19.9893
Cyrtopsis	-100.399	19.6531
Cyrtopsis	-105.877	23.5956
Cyrtopsis	-105.846	23.4186
Cyrtopsis	-98.783	20.7959
Cyrtopsis	-100.947	25.354
Cyrtopsis	-100.996	25.2769

## Sheet: T. eques
Species	long	lat
Eques	-100.252	19.527
Eques	-105.68	25.3113
Eques	-102.589	20.2531
Eques	-98.862	19.973
Eques	-104.479	25.0361
Eques	-98.393	19.888
Eques	-106.222	26.6473
Eques	-103.733	22.82
Eques	-110.407	31.2818
Eques	-102.952	21.0836
Eques	-100.368	19.542
Eques	-100.284	19.398
Eques	-100.262	19.48
Eques	-100.323	19.404
Eques	-108.959	30.4881
Eques	-108.391	29.6551
Eques	-107.074	27.0001
Eques	-100.377	19.539
Eques	-100.311	19.403
Eques	-107.831	28.9507
Eques	-98.2038	19.0453
Eques	-105.432	23.7569
Eques	-100.269	19.543
Eques	-107.523	27.5914
Eques	-107.592	27.8364
Eques	-100.243	19.521
Eques	-100.321	19.459
Eques	-102.989	21.0826
Eques	-100.23	19.505
Eques	-102.949	20.1691
Eques	-105.549	23.636
Eques	-108.935	30.4794
Eques	-103.999	20.897
Eques	-105.912	25.189
Eques	-100.305	19.41
Eques	-105.466	23.7323
Eques	-98.1808	19.0427
Eques	-103.257	20.2905
Eques	-98.4262	19.275
Eques	-99.7097	19.3078
Eques	-101.14	19.9257
Eques	-101.103	20.2251
Eques	-99.7899	19.9244
Eques	-99.8578	19.9393
Eques	-99.4977	19.2348
Eques	-99.45	19.2333
Eques	-99.4942	19.1638
Eques	-99.4956	19.2605
Eques	-99.519	19.2677
Eques	-99.4933	19.3551
Eques	-99.666	19.4516
Eques	-98.3617	20.3167
Eques	-100.167	20.8108
Eques	-100.615	22.0319
Eques	-98.1075	20.1134
Eques	-109.29	29.9237
Eques	-99.8976	19.7328
Eques	-99.8871	19.7441
Eques	-101.883	21.9833
Eques	-102.317	22.2333
Eques	-102.283	21.7667
Eques	-102.596	22.183
Eques	-102.333	22.1833
Eques	-102.367	22.1167
Eques	-107.4	28.5167
Eques	-104.883	29.4167
Eques	-108.4	29.6517
Eques	-107.85	27.5167
Eques	-106.8	29.5167
Eques	-107.6	27.7333
Eques	-108.383	29.6167
Eques	-107.91	30.4433
Eques	-108.333	29.9667
Eques	-107.95	28.7167
Eques	-108.083	30.3167
Eques	-105.1	29.4667
Eques	-107.617	27.7333
Eques	-108.535	30.7681
Eques	-108.293	30.7167
Eques	-106.367	29.7333
Eques	-105.497	29.0719
Eques	-108.3	28.0167
Eques	-107.583	30.0667
Eques	-107.3	30.2833
Eques	-108.35	30.0833
Eques	-106.248	28.3667
Eques	-108.217	28.1667
Eques	-107.283	30.4333
Eques	-105.25	26.5833
Eques	-105.823	26.8097
Eques	-105.717	26.8167
Eques	-107.6	28.6333
Eques	-107.483	27.7833
Eques	-101.184	26.7764
Eques	-104.667	24.0333
Eques	-99.1083	19.4883
Eques	-99.1667	19.3833
Eques	-99.1	19.3167
Eques	-99.2	19.3333
Eques	-99.2833	19.3333
Eques	-99.1333	19.3167
Eques	-105.35	23.7833
Eques	-105.283	23.8167
Eques	-105.333	23.8167
Eques	-105.518	24.2917
Eques	-104.6	24.1333
Eques	-105.433	23.6667
Eques	-105.1	23.8167
Eques	-105.317	23.8667
Eques	-105.617	23.9833
Eques	-105.317	23.7833
Eques	-105.417	23.7667
Eques	-105.467	23.7167
Eques	-104.117	25.1833
Eques	-105.05	23.8833
Eques	-105.953	24.1447
Eques	-103.923	23.6203
Eques	-104.275	23.2967
Eques	-106.411	24.9272
Eques	-105.417	25.0333
Eques	-104.67	24.0236
Eques	-105.5	26.3667
Eques	-98.9542	19.4375
Eques	-99.7883	20.0928
Eques	-99.7111	19.3986
Eques	-99.8394	19.9558
Eques	-99.735	20.1125
Eques	-99.6867	19.4053
Eques	-99.4647	19.1917
Eques	-98.95	19.4167
Eques	-99.825	19.7467
Eques	-99.6128	19.4233
Eques	-99.5117	19.2833
Eques	-104.25	20.8328
Eques	-99.7236	20.0831
Eques	-99.9339	19.7075
Eques	-99.3939	19.2419
Eques	-99.2533	17.6694
Eques	-99.6833	17.5667
Eques	-101.183	20.1167
Eques	-100.767	20.5167
Eques	-101.333	20.9333
Eques	-100.722	20.0317
Eques	-101.2	20.3833
Eques	-100.792	21.0533
Eques	-99.5008	17.5569
Eques	-98.4167	19.8667
Eques	-98.3833	19.8833
Eques	-98.13	20.1367
Eques	-98.98	20.6467
Eques	-103.533	20.7333
Eques	-102.433	21.5333
Eques	-103.85	20.5667
Eques	-103.183	20.2833
Eques	-103.233	20.4167
Eques	-103.333	20.6833
Eques	-103.317	20.8667
Eques	-102.717	20.2833
Eques	-103.433	20.2833
Eques	-103.667	20.4167
Eques	-103.567	20.7333
Eques	-98.81	19.3167
Eques	-100.098	19.3767
Eques	-98.8967	19.2583
Eques	-99.9528	19.4203
Eques	-99.38	19.0356
Eques	-99.8472	19.0639
Eques	-99.7117	19.3233
Eques	-100.017	19.2833
Eques	-99.6833	19.3333
Eques	-99.7667	19.5667
Eques	-99.235	19.6267
Eques	-99.2167	19.7167
Eques	-99.8667	19.3167
Eques	-99.7	19.2833
Eques	-100.717	19.6667
Eques	-101.967	19.2833
Eques	-102.85	20.1333
Eques	-101.612	19.5183
Eques	-101.583	19.5833
Eques	-102.2	19.8833
Eques	-102.05	19.4167
Eques	-102.287	19.9867
Eques	-100.833	19.8833
Eques	-101.2	19.8833
Eques	-101.533	19.5333
Eques	-101.367	19.6667
Eques	-101.783	19.8167
Eques	-99.1	18.9833
Eques	-99.3	19.0667
Eques	-99.24	19.0533
Eques	-99.3033	19.0517
Eques	-104.85	21.4667
Eques	-104.895	21.5167
Eques	-104.761	21.4117
Eques	-100.32	24.8458
Eques	-96.695	17.1267
Eques	-97.6167	19.3167
Eques	-97.9333	18.9667
Eques	-98.4375	18.9069
Eques	-97.5019	19.2133
Eques	-97.2667	18.5833
Eques	-97.7275	18.8833
Eques	-100.13	20.1417
Eques	-100.105	20.1128
Eques	-100.092	20.3917
Eques	-100.115	20.7039
Eques	-100.317	20.6167
Eques	-100.384	22.6325
Eques	-100.414	22.6689
Eques	-100.384	22.7209
Eques	-110.859	30.7511
Eques	-110.146	31.3132
Eques	-109.578	31.2789
Eques	-110.166	30.3347
Eques	-109.188	31.3083
Eques	-110.867	30.9333
Eques	-110.943	31.3217
Eques	-108.926	28.3711
Eques	-98.14	19.4156
Eques	-97.0833	19.6367
Eques	-103.367	21.2167
Eques	-102.885	22.6183
Eques	-103.083	21.5833
Eques	-102.95	23.4833
Eques	-102.983	23.4833
Eques	-103.45	22.7167
Eques	-105.4	23.702
Eques	-106.254	26.6318
Eques	-99.1124	19.3357
Eques	-99.5354	19.8743
Eques	-103.316	20.3225
Eques	-99.9402	20.6934
Eques	-103.771	20.0382
Eques	-99.2773	21.2256
Eques	-107.216	27.1737
Eques	-102.921	21.0462
Eques	-98.2972	19.232
Eques	-102.419	22.2444
Eques	-102.985	21.1079
Eques	-102.971	21.1496
Eques	-100.102	20.5621
Eques	-98.3542	19.3813
Eques	-103.862	20.6093
Eques	-103.822	20.7893
Eques	-108.357	28.0229
Eques	-99.3513	19.1512
Eques	-108.735	27.1632
Eques	-108.775	27.0294
Eques	-110.612	29.2407
Eques	-99.7595	19.3887
Eques	-99.6444	19.2783
Eques	-98.9471	19.5566
Eques	-99.247	19.1533
Eques	-99.6439	19.2564
Eques	-99.8142	20.6698
Eques	-102.58	22.1857
Eques	-99.1396	19.8102
Eques	-100.664	20.1592
Eques	-99.6607	19.342
Eques	-103.503	21.5478
Eques	-101.744	19.8901
Eques	-99.752	20.1753
Eques	-102.635	22.0062
Eques	-102.723	22.0784
Eques	-101.983	21.8255
Eques	-101.892	21.978
Eques	-101.708	19.8935
Eques	-108.351	28.3859
Eques	-99.7894	20.3059
Eques	-100.145	19.928
Eques	-103.801	20.7414
Eques	-108.808	30.2216
Eques	-98.4259	20.3276

## Sheet: T. melanogaster
Species	long	lat
Melanogaster	-102.589	20.2531
Melanogaster	-99.139	19.275
Melanogaster	-100.262	19.48
Melanogaster	-99.0041	19.3835
Melanogaster	-105.387	23.7938
Melanogaster	-99.159	19.459
Melanogaster	-99.273	20.209
Melanogaster	-99.328	19.984
Melanogaster	-99.6045	20.1348
Melanogaster	-99.703	19.3136
Melanogaster	-101.14	19.9257
Melanogaster	-101.103	20.2251
Melanogaster	-99.6965	19.4061
Melanogaster	-99.7899	19.9244
Melanogaster	-99.8578	19.9393
Melanogaster	-99.4977	19.2348
Melanogaster	-100.057	19.4597
Melanogaster	-99.45	19.2333
Melanogaster	-99.4942	19.1638
Melanogaster	-99.4956	19.2605
Melanogaster	-100.165	19.8843
Melanogaster	-100.076	19.9221
Melanogaster	-99.4376	19.2203
Melanogaster	-99.4933	19.3551
Melanogaster	-99.0833	21.25
Melanogaster	-100.205	20.1189
Melanogaster	-101.768	21.8251
Melanogaster	-104.021	20.8913
Melanogaster	-102.643	19.8371
Melanogaster	-100.953	19.8873
Melanogaster	-101.141	20.2205
Melanogaster	-101.883	21.9833
Melanogaster	-101.967	21.9167
Melanogaster	-102.35	22.1167
Melanogaster	-102.333	22.1833
Melanogaster	-102.367	22.1333
Melanogaster	-107.85	27.5167
Melanogaster	-107.483	27.5167
Melanogaster	-99.1833	19.4167
Melanogaster	-104.702	24.3646
Melanogaster	-105.05	23.8833
Melanogaster	-104.275	23.2967
Melanogaster	-98.9542	19.4375
Melanogaster	-99.7111	19.3986
Melanogaster	-99.735	19.4833
Melanogaster	-99.4903	19.2847
Melanogaster	-99.3117	19.0494
Melanogaster	-100.767	20.5167
Melanogaster	-103.85	20.5667
Melanogaster	-103.183	20.2833
Melanogaster	-103.333	20.6833
Melanogaster	-103.317	20.8667
Melanogaster	-102.717	20.2833
Melanogaster	-103.433	20.2833
Melanogaster	-99.875	19.7983
Melanogaster	-98.8967	19.2583
Melanogaster	-99.6883	19.3333
Melanogaster	-99.1531	19.8256
Melanogaster	-104.325	28.0873
Melanogaster	-99.3739	19.3217
Melanogaster	-101.612	19.5183
Melanogaster	-101.783	19.8167
Melanogaster	-101.633	19.6667
Melanogaster	-100.833	19.8833
Melanogaster	-101.2	19.8833
Melanogaster	-100.237	19.4367
Melanogaster	-101.367	19.6667
Melanogaster	-104.895	21.5167
Melanogaster	-104.867	21.4667
Melanogaster	-98.5014	19.2303
Melanogaster	-100.133	20.1333
Melanogaster	-100.103	20.4094
Melanogaster	-99.8833	20.5167
Melanogaster	-109.013	30.6453
Melanogaster	-108.8	28.323
Melanogaster	-103.267	23.5667
Melanogaster	-102.883	22.2833
Melanogaster	-99.0894	19.2726
Melanogaster	-105.53	23.649
Melanogaster	-99.1951	19.3209
Melanogaster	-99.1348	19.3131
Melanogaster	-103.724	20.2056
Melanogaster	-103.886	20.7119
Melanogaster	-99.9397	20.3509
Melanogaster	-99.2985	20.5914
Melanogaster	-99.3947	19.151
Melanogaster	-99.3292	19.1589
Melanogaster	-99.1488	19.2069
Melanogaster	-99.202	19.1015
Melanogaster	-99.2468	19.0974
Melanogaster	-100.76	19.8161
Melanogaster	-99.1305	19.2875
Melanogaster	-102.626	21.773
Melanogaster	-99.0671	19.2684
Melanogaster	-101.203	19.6606
Melanogaster	-98.9052	19.2913
Melanogaster	-98.8503	20.6682
Melanogaster	-98.982	20.7959
Melanogaster	-99.1172	19.2973
Melanogaster	-99.078	19.357
Melanogaster	-101.679	19.9502
Melanogaster	-100.767	20.1645
Melanogaster	-99.0238	19.3658

## Sheet: T. scalaris
Species	long	lat
Scalaris	-100.326	19.458
Scalaris	-100.307	19.406
Scalaris	-100.219	19.499
Scalaris	-97.1389	19.6214
Scalaris	-100.282	19.393
Scalaris	-99.4985	19.5333
Scalaris	-98.494	19.831
Scalaris	-100.208	19.506
Scalaris	-97.2955	19.0439
Scalaris	-100.254	19.534
Scalaris	-99.9436	19.2183
Scalaris	-99.7004	19.3109
Scalaris	-99.803	19.863
Scalaris	-99.6965	19.4061
Scalaris	-99.9957	19.9449
Scalaris	-99.7899	19.9244
Scalaris	-99.45	19.2333
Scalaris	-99.4956	19.2605
Scalaris	-99.4376	19.2203
Scalaris	-99.3156	19.0491
Scalaris	-100.258	19.5086
Scalaris	-99.8973	19.7328
Scalaris	-99.3928	19.35
Scalaris	-99.9651	19.2191
Scalaris	-99.7126	19.2825
Scalaris	-99.1	19.3167
Scalaris	-99.47	19.2
Scalaris	-101.57	19.67
Scalaris	-97.03	19.63
Scalaris	-99.1917	19.335
Scalaris	-98.7333	20.2167
Scalaris	-99.8472	19.0639
Scalaris	-99.35	19.06
Scalaris	-99.66	19.41
Scalaris	-96.9283	19.545
Scalaris	-97.19	18.98
Scalaris	-100.05	17.93
Scalaris	-97.25	19.0333
Scalaris	-97.2333	19.0333
Scalaris	-96.5833	17.35
Scalaris	-96.8	17.01
Scalaris	-97.29	18.94
Scalaris	-98.74	19.31
Scalaris	-98.7	19.3508
Scalaris	-99.36	19.3
Scalaris	-99.6467	19.285
Scalaris	-99.953	19.42
Scalaris	-97.35	19.05
Scalaris	-102.367	19.3333
Scalaris	-97.0667	19.3667
Scalaris	-98.7333	20.3667
Scalaris	-97.0833	19.65
Scalaris	-98.64	19.35
Scalaris	-99.24	19.05
Scalaris	-96.41	19.44
Scalaris	-97.25	18.7667
Scalaris	-99.29	19.08
Scalaris	-97.1	19.64
Scalaris	-99.2764	19.1256
Scalaris	-104.82	20.16
Scalaris	-98.195	19.3333
Scalaris	-97.0533	18.8667
Scalaris	-99.8167	19.3
Scalaris	-99.72	17.55
Scalaris	-100.08	17.43
Scalaris	-97.02	16.59
Scalaris	-96.6	17.19
Scalaris	-96.51	17.59
Scalaris	-96.7833	17.25
Scalaris	-97.3	18.46
Scalaris	-97.25	19.6667
Scalaris	-97.1453	19.6428
Scalaris	-99.28	19.23
Scalaris	-99.3	19.1333
Scalaris	-98.86	19.14
Scalaris	-99.2167	19.2167
Scalaris	-99.3	19.15
Scalaris	-101.253	21.15
Scalaris	-104.817	21.45
Scalaris	-99.22	19.15
Scalaris	-101.92	19.65
Scalaris	-97.28	18.95
Scalaris	-97.24	18.89
Scalaris	-97.1106	18.8519
Scalaris	-97.1	18.85
Scalaris	-97.1667	19.6333
Scalaris	-98.63	19.03
Scalaris	-99.22	19.1
Scalaris	-103.59	20.32
Scalaris	-99.9333	19.2833
Scalaris	-98.68	19.09
Scalaris	-95.64	18.72
Scalaris	-95.58	18.69
Scalaris	-97.2667	19.6833
Scalaris	-97.25	19.75
Scalaris	-97.06	19.62
Scalaris	-99.2358	19.0206
Scalaris	-99.22	19.03
Scalaris	-99.23	19.09
Scalaris	-98.2	19.29
Scalaris	-97.23	19.81
Scalaris	-98.78	19.25
Scalaris	-97.46	19.85
Scalaris	-96.46	15.95
Scalaris	-99.26	19.04
Scalaris	-99.2833	19.2833
Scalaris	-98.7333	19.3167
Scalaris	-97.34	18.72
Scalaris	-97.33	18.72
Scalaris	-96.6833	17.2333
Scalaris	-97.2975	18.6963
Scalaris	-99.2308	19.0544
Scalaris	-99.5008	17.5569
Scalaris	-97.2927	19.788
Scalaris	-96.4333	17.4333
Scalaris	-96.4333	17.4167
Scalaris	-98.1917	19.085
Scalaris	-96.77	17.06
Scalaris	-96.4667	16.0667
Scalaris	-98.34	20.41
Scalaris	-98.6697	19.3525
Scalaris	-98.71	19.34
Scalaris	-101.53	19.4
Scalaris	-101.51	19.41
Scalaris	-98.13	20.09
Scalaris	-97.93	19.79
Scalaris	-97.25	19.7
Scalaris	-103.923	19.945
Scalaris	-96.4667	17.1167
Scalaris	-96.7333	18.8833
Scalaris	-98.7217	19.305
Scalaris	-99.85	17.66
Scalaris	-100.28	17.56
Scalaris	-98.75	20.22
Scalaris	-98.725	20.3717
Scalaris	-99.4139	19.6375
Scalaris	-100.083	19.3667
Scalaris	-97.04	16.94
Scalaris	-96.51	17.58
Scalaris	-97.89	16.93
Scalaris	-97.09	17.03
Scalaris	-97.05	16.93
Scalaris	-97.1062	16.9295
Scalaris	-97	16.94
Scalaris	-97.01	16.94
Scalaris	-97.03	16.94
Scalaris	-96.5	17.45
Scalaris	-97.22	19.11
Scalaris	-99.7111	19.3986
Scalaris	-99.6867	19.4053
Scalaris	-97.5459	19.7916
Scalaris	-99.3026	19.2203
Scalaris	-99.3181	19.2544
Scalaris	-98.04	19.2761
Scalaris	-99.2837	19.2391
Scalaris	-97.1983	19.047
Scalaris	-97.1799	19.031
Scalaris	-98.0666	19.7286
Scalaris	-99.3033	19.0439
Scalaris	-98.1418	19.385
Scalaris	-98.0348	20.0338
Scalaris	-98.17	19.66
Scalaris	-98.0317	19.23
Scalaris	-98.6016	19.1247
Scalaris	-98.1543	19.5602
Scalaris	-97.1572	19.6586
Scalaris	-98.6622	19.0369
Scalaris	-100.386	19.4056
Scalaris	-99.244	19.2816
Scalaris	-100.269	19.6461
Scalaris	-99.3314	19.0239
Scalaris	-97.7287	19.2622
Scalaris	-98.1281	19.4668
Scalaris	-98.1417	19.8121
Scalaris	-98.0847	19.8567
Scalaris	-99.7486	19.2672
Scalaris	-99.7173	19.2578
Scalaris	-99.6662	19.3086
Scalaris	-97.91	19.2867
Scalaris	-98.9016	19.1769
Scalaris	-99.5976	19.3489
Scalaris	-100.167	19.8766
Scalaris	-98.1645	19.9624
Scalaris	-98.0373	19.9765
Scalaris	-99.659	19.3679
Scalaris	-97.0619	19.6409

## Sheet: T. scaliger
Species	long	lat
Scaliger	-99.3063	19.5947
Scaliger	-99.122	19.506
Scaliger	-98.495	19.639
Scaliger	-99.803	19.863
Scaliger	-99.9007	19.7432
Scaliger	-104.35	19.75
Scaliger	-104.82	20.44
Scaliger	-102.317	19.4133
Scaliger	-99.83	19.72
Scaliger	-99.81	19.68
Scaliger	-101.65	21.61
Scaliger	-99.07	19.46
Scaliger	-99.2333	19.4333
Scaliger	-100.35	19.4333
Scaliger	-99.26	19.21
Scaliger	-99.3	19.0667
Scaliger	-99.1833	19.3167
Scaliger	-98.6833	19.35
Scaliger	-99.24	19.8
Scaliger	-99.2	19.4833
Scaliger	-98.75	20.22
Scaliger	-101.367	19.6667
Scaliger	-99.8	19.29
Scaliger	-98.7	19.3583
Scaliger	-98.6861	19.0819
Scaliger	-98.2	19.29
Scaliger	-101.6	21.81
Scaliger	-98.6383	19.125
Scaliger	-98.7778	19.0567
Scaliger	-99.41	19.6283
Scaliger	-98.7767	19.0439
Scaliger	-98.815	19.3222
Scaliger	-98.7439	19.1272
Scaliger	-98.6703	19.3517
Scaliger	-98.7083	19.33
Scaliger	-99.25	19.21
Scaliger	-99.22	19.32
Scaliger	-99.27	19.22
Scaliger	-99.25	19.3
Scaliger	-99.15	19.2
Scaliger	-99.1	19.48
Scaliger	-99.25	19.2
Scaliger	-99.24	19.3
Scaliger	-99.14	19.27
Scaliger	-98.89	19.49
Scaliger	-99.28	19.13
Scaliger	-98.7217	19.305
Scaliger	-98.9589	19.2064
Scaliger	-99.33	19.05
Scaliger	-99.4903	19.2847
Scaliger	-99.4139	19.6375
Scaliger	-99.31	19.05
Scaliger	-99.3939	19.2419
Scaliger	-101.65	19.54
Scaliger	-101.46	20.09
Scaliger	-99.43	19.56
Scaliger	-97.1	19.64
Scaliger	-98.7683	19.2646
Scaliger	-101.696	19.5075
Scaliger	-99.3142	19.3458
Scaliger	-99.2838	19.6112
Scaliger	-98.6951	19.0743
Scaliger	-101.277	19.574
Scaliger	-101.319	19.4236
Scaliger	-99.029	19.3259
Scaliger	-100.358	19.5681
Scaliger	-99.3531	19.593
Scaliger	-99.6796	19.3866
Scaliger	-99.7737	19.2091
Scaliger	-99.6005	19.3557
Scaliger	-99.7199	19.259
Scaliger	-99.7915	19.2219
Scaliger	-99.6005	19.2583
Scaliger	-99.6398	19.355
Scaliger	-99.6892	19.2443
Scaliger	-99.2714	19.7852
